# Supplementary material for: Facile Synthesis of 3D Interconnected Porous g-C3N4/rGO Composite for Hydrogen Production and Dye Elimination
Source: MDPI journal article supplement (doi:10.3390/catal13071079), 2023-07-07
Supplement: s1 [file s1]

**Table S1.** The comparison of photocatalytic performance with reported 2D g-C<sub>3</sub>N<sub>4</sub>-based materials and 3D rGO/g-C<sub>3</sub>N<sub>4</sub>.

| Materials                                                         | Morphology | photocatalytic performance                                                                                        | Ref.      |
|-------------------------------------------------------------------|------------|-------------------------------------------------------------------------------------------------------------------|-----------|
| polystyrene-TiO <sub>2</sub> /rGO/g-C <sub>3</sub> N <sub>4</sub> | 2D         | RTB dye degradation (51.43%)                                                                                      | [1]       |
| S@g-C <sub>3</sub> N <sub>4</sub> QD sensor                       | 2D         | NH <sub>3</sub> response (14.2 kHz)                                                                               | [2]       |
| X-PCN (X = Cl, Br, or I)                                          | 2D         | H <sub>2</sub> O <sub>2</sub> generation (199.0 μmol h <sup>-1</sup> )                                            | [3]       |
| SCBCN                                                             | 2D         | H <sub>2</sub> O <sub>2</sub> generation (620 μmol h <sup>-1</sup> )                                              | [4]       |
| rGO/g-C <sub>3</sub> N <sub>4</sub>                               | 2D         | MO degradation (92.3%)                                                                                            | [5]       |
| g-C <sub>3</sub> N <sub>4</sub> /rGO                              | 3D         | H <sub>2</sub> O <sub>2</sub> generation (4.37 mmol g <sup>-1</sup> h <sup>-1</sup> ) and RhB degradation (96.2%) | This work |

**Table S2.** Specific surface areas and total pore volumes of BCN, PCN, GPCN-1, GPCN-2 and GPCN-3.

| Samples | Specific surface areas            | Total pore volumes                 |
|---------|-----------------------------------|------------------------------------|
|         | (m <sup>2</sup> g <sup>-1</sup> ) | (cm <sup>3</sup> g <sup>-1</sup> ) |
| BCN     | 19.738                            | 0.165                              |
| PCN     | 80.604                            | 0.576                              |
| GPCN-1  | 86.942                            | 0.620                              |
| GPCN-2  | 90.909                            | 0.635                              |
| GPCN-3  | 89.389                            | 0.600                              |

**Table S3.** The contents of C and N in PCN and GPCN-2 catalysts according to the

| XPS measurement. |        |        |      |
|------------------|--------|--------|------|
| Atomic %         | C      | N      | C/N  |
| PCN              | 40.96% | 57.59% | 0.71 |
| GPCN-2           | 41.98% | 57.62% | 0.73 |

**Table S4.** Lifetime profile and corresponding carrier dynamics information of PCN  
and GPCN-2.

| Samples | Decay time (ns) |          | Relative amplitude |                | Average lifetime (ns) |
|---------|-----------------|----------|--------------------|----------------|-----------------------|
|         | $\tau_1$        | $\tau_2$ | A <sub>1</sub>     | A <sub>2</sub> |                       |
| PCN     | 2.43            | 11.09    | 128.34             | 0.42           | 2.56                  |
| GPCN-2  | 18.87           | 3.17     | 0.20               | 49.33          | 3.45                  |

**Table S5.** The comparison of photocatalytic RhB degradation performance with reported g-C<sub>3</sub>N<sub>4</sub>-based photocatalysts.

| Photocatalyst                          | Light source               | irradiation time (min) | RhB degradation rate (%) | Ref.      |
|----------------------------------------|----------------------------|------------------------|--------------------------|-----------|
| LSACF/g-C <sub>3</sub> N <sub>4</sub>  | 500 W Xe lamp              | 150                    | 90.1                     | [6]       |
| BiOI/g-C <sub>3</sub> N <sub>4</sub>   | 300 W Xe lamp              | 75                     | 96                       | [7]       |
| Fe-g-C <sub>3</sub> N <sub>4</sub>     | 300 W Xe lamp              | 45                     | 95.5                     | [8]       |
| SAPO-5/g-C <sub>3</sub> N <sub>4</sub> | 500 W Xe lamp              | 120                    | 94.7                     | [9]       |
| g-C <sub>3</sub> N <sub>4</sub> /rGO   | 500 W metal<br>halide lamp | 12                     | 96.2                     | This work |

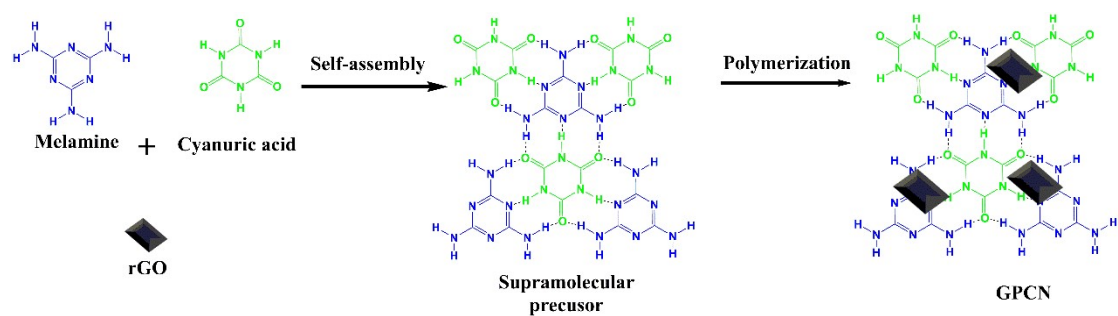

Figure S1. Schematic illustration of the preparation routes for the GPCN.

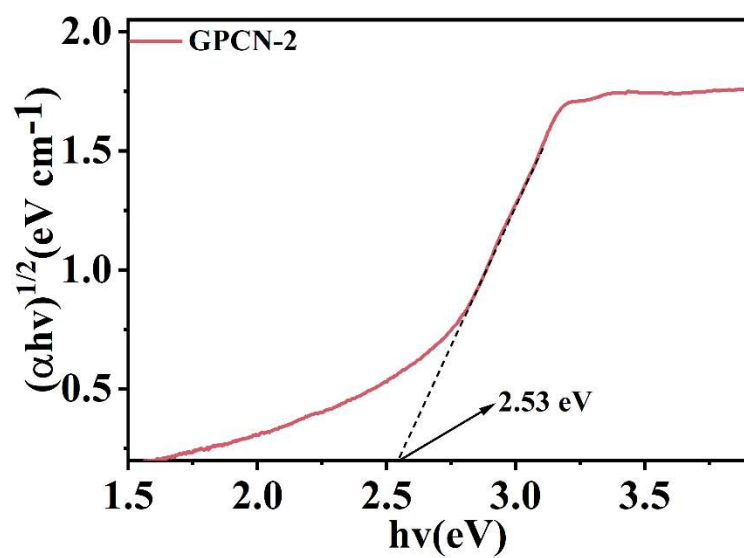

Figure S2. The plots of transformed Kubelka-Munk function versus light energy of GPCN-2.

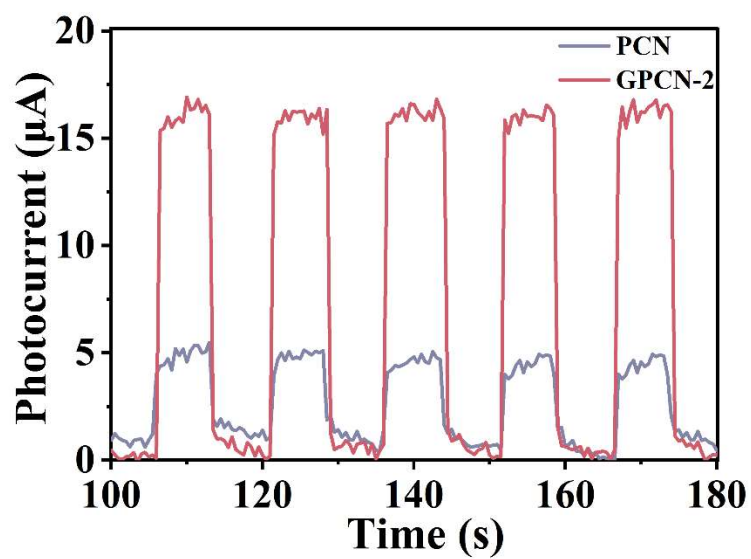

Figure S3. Transient photocurrent of PCN and GPCN-2.

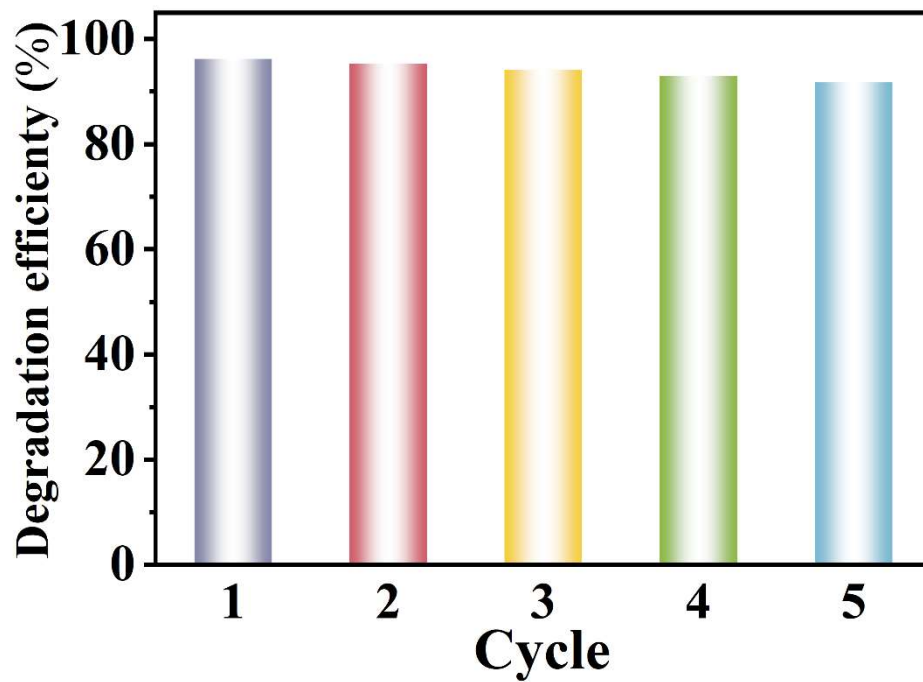

Figure S4. Photocatalytic stability of GPCN-2.

## Characterization

X-ray diffraction (XRD) patterns of the catalysts were collected on a Holland Panalytical PRO PW3040/60. The surface chemical status of the samples was characterized by X-ray photoelectron spectroscopy (XPS, Kratos-AXIS ULTRA DLD, Al K $\alpha$  X-ray source)). The morphologies and structures of the synthesized samples were characterized by field-emission scanning electron microscopy (FESEM, Hitachi S-4800) and high-resolution transmission electron microscopy (HRTEM, JEOL, JEM-2010). UV-Vis diffuse reflectance spectra (DRS) of the prepared samples were obtained by a Hitachi U-3900 spectrophotometer. The room temperature photoluminescence (PL) spectra were examined by fluorescence spectrophotometer (HORIBA Jobin Yvon fluoromax-4) with an excitation wavelength of 385 nm. The Brunauer-Emmett-Teller (BET) specific surface areas of the as-prepared samples were evaluated based on nitrogen adsorption isotherms measured at 77 K using a BELSORP-max nitrogen adsorption apparatus (Micrometitics, Norcross, GA). EIS was performed over a frequency range from 0.1 Hz to 1 MHz at open-circuit potential in 0.1 M Na<sub>2</sub>SO<sub>4</sub> solution under Xe light irradiation. Catalyst-loaded indium tin oxides (ITO) electrodes (6 × 6 mm) served as working electrode, a Pt foil as the counter electrode, and an Ag/AgCl electrode as the reference electrode. 10 mg catalyst was uniformly suspended in 1 mL alcohol, then 200  $\mu$ L suspension was spread on ITO, and EIS could be conducted when the alcohol was completely volatilized.

## **Photocatalytic H<sub>2</sub> evolution experiments**

The photocatalytic H<sub>2</sub> evolution experiments were carried out in glass reaction vessel equipped with a glass closed trace gas analysis system (CEL-PAEM-D8, CEAU Light). Visible light was obtained from a 300 W Xe lamp with a 420 nm cutoff filter (average light intensity: 100 mW cm<sup>-2</sup>). 50 mg of photocatalysts were added into 100 mL solution (90 mL deionized water and 10 mL triethanolamine as sacrificial agent). 1wt.% Pt as co-catalysts were loaded on the photocatalysts by in situ photo-deposition method using H<sub>2</sub>PtCl<sub>6</sub>. Before light irradiation, the suspensions were ultrasonically dispersed in the dark for 30 min to achieve absorption-desorption equilibrium. At given time intervals (30 min), a certain amount of produced gas was measured by an online gas chromatograph (GC-2002 N/TFF) equipped with a thermal conductive detector (TCD) and a 5 Å molecular sieve column, using argon as the carrier gas. Product gases were calibrated with standard H<sub>2</sub> gas and their identities were determined according to the retention time.

## **Photocatalytic degradation experiments**

The catalytic performance of catalysts was evaluated by degradation of rhodamine B (RhB). All reactions were carried out in a photochemical reactor (Yanzheng Co., Ltd) with condensed water under stirring. A 500 W of metal halide lamp with 420 nm cutoff filter (average light intensity:  $30 \text{ mW cm}^{-2}$ ) was used as the light source. Briefly, 10 mg of catalyst was ultrasonically dispersed into RhB solution (60 mL,  $20 \text{ mg L}^{-1}$ ), then stirred in darkness for 10 min to achieve an adsorption-desorption balance between catalyst and RhB. During catalytic reaction, 3 mL of suspension was taken out at given time intervals (2 min) and immediately centrifuged to remove the catalyst. The filtrate of RhB was determined with a Hitachi U-3900 UV-vis spectrophotometer and the absorbance value of RhB was used to calculate the concentration at the maximum absorption wavelength.



## References

1. Das, S.; Mahalingam, H. Dye degradation studies using immobilized pristine and waste polystyrene-TiO<sub>2</sub>/rGO/g-C<sub>3</sub>N<sub>4</sub> nanocomposite photocatalytic film in a novel airlift reactor under solar light. *J. Environ. Chem. Eng.* **2019**, *7* (5), 103289.
2. Pasupuleti, K.S.; Chougule, S.S.; Vidyasagar, D.; Bak, N.-h.; Jung, N.; Kim, Y.-H.; Lee, J.-H.; Kim, S.-G.; Kim, M.-D. UV light driven high-performance room temperature surface acoustic wave NH<sub>3</sub> gas sensor using sulfur-doped g-C<sub>3</sub>N<sub>4</sub> quantum dots. *Nano Res.* **2023**, *16* (5), 7682-7695.
3. Gupta, A.; Bhoyar, T.; Abraham, B.M.; Kim, D.J.; Pasupuleti, K.S.; Umare, S.S.; Vidyasagar, D.; Gedanken, A. Potassium molten salt-mediated in situ structural reconstruction of a carbon nitride photocatalyst. *ACS Appl. Mater. Interfaces* **2023**, *15* (15), 18898-18906.
4. You, Q.; Zhang, C.; Cao, M.; Wang, B.; Huang, J.; Wang, Y.; Deng, S.; Yu, G. Defects controlling, elements doping, and crystallinity improving triple-strategy modified carbon nitride for efficient photocatalytic diclofenac degradation and H<sub>2</sub>O<sub>2</sub> production. *Appl. Catal. B: Environ.* **2023**, *321*, 121941.
5. Li, Y.; Zhang, D.; Chen, Q.; Chao, C.; Sun, J.; Dong, S.; Sun, Y. Synthesis of rGO/g-C<sub>3</sub>N<sub>4</sub> for methyl orange degradation in activating peroxydisulfate under simulated solar light irradiation. *J. Alloys Compd.* **2022**, *907*, 164500.
6. Yang, H.; Li, E.; Zhou, B.; Wang, Y.; Li, P.; Xia, S. Preparation and characterization of a g-C<sub>3</sub>N<sub>4</sub>/LSACF composite and application in RhB degradation. *J Inorg. Organomet. Polym. Mater.* **2020**, *30* (4), 1463-1472.

7. Wang, Y.; Zheng, Z.; Li, Y.; Jia, P.; Liu, T. Study on photocatalytic activity of Ag<sub>2</sub>O modified BiOI/g-C<sub>3</sub>N<sub>4</sub> composite photocatalyst for degradation of RhB. *J. Electron. Mater.* **2022**, *51* (10), 5508-5520.
8. Ji, S.; Yang, Y.; Zhou, Z.; Li, X.; Liu, Y. Photocatalysis-Fenton of Fe-doped g-C<sub>3</sub>N<sub>4</sub> catalyst and its excellent degradation performance towards RhB. *J. Water Process. Eng.* **2021**, *40*, 101804.
9. Qiu, L.; Zhou, Z.; Ma, M.; Li, P.; Lu, J.; Hou, Y.; Chen, X.; Duo, S. Enhanced visible-light photocatalytic performance of SAPO-5-based g-C<sub>3</sub>N<sub>4</sub> composite for Rhodamine B (RhB) degradation. *Materials* **2019**, *12* (23), 3948.
