# Supplementary material for: Facile Synthesis of 3D Interconnected Porous g-C3N4/rGO Composite for Hydrogen Production and Dye Elimination
Source: MDPI journal article supplement (doi:10.3390/catal13071079), 2023-07-07
Supplement: s1 [file s1]

Archive with 1 entries (1 files):
- catalysts-2473893-supplementary.pdf
